# Supplementary material
Source: PubMed Central journal article supplement (PMC4002109)
Supplement: supp_M113.539890_jbc.M113.539890-1.pdf [file supp_M113.539890_jbc.M113.539890-1.pdf]

Grahn et al, Supplementary Fig. 1

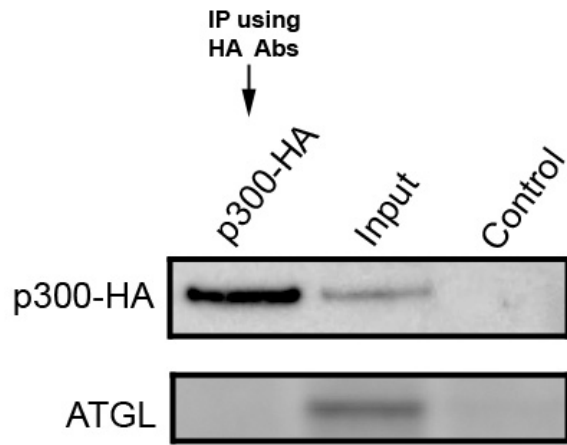

Grahn et al, Supplementary Fig. 2

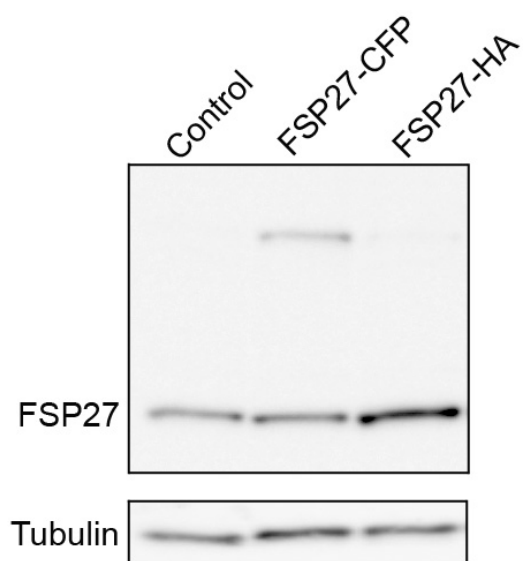

## LEGENDS FOR SUPPLEMENTARY DATA

**Supplementary Figure 1.** *ATGL does not bind to HA epitope:* In 293T cells expressing ATFL-CFP and p300-HA, HA antibodies were used to immunoprecipitate p300-HA and immunoblotted with HA (upper panel) and ATGL antibodies (lower panel). HA antibodies pulled-down p300 (left lane upper panel) but not ATGL (left lane lower panel).

**Supplementary Figure 2.** *Two- to threefold increase in overall FSP27 expression using adenovirus in human adipocytes:* FSP27-CFP (middle lane) and FSP27-HA (right lane) was expressed using adenovirus. Note the top band in the middle lane of upper panel is FSP27 labeled with CFP.
